# Supplementary material
Source: MDPI journal article supplement (https://www.mdpi.com/2073-445X/11/8/1211)

Table S1 Statistical parameters for each model

Figure S1. Spatial distribution of CO<sub>2</sub> emissions for 2009 (a) and 2019 (b) in the study area

Figure S2. Land use data for 2009 (a) and 2019 (b) in the study area

Figure S3 Proportion of other land-use types converted to urban land in 2035

Table S1 Statistical parameters for each model

| Statistical Model                                                                                                                      | Adjusted $R^2$ | SSR   | df | AIC    | F-value | <i>P</i> -value |
|----------------------------------------------------------------------------------------------------------------------------------------|----------------|-------|----|--------|---------|-----------------|
| Logarithmic model for the CO <sub>2</sub> emissions per unit urban area and urban area                                                 | 0.327          | 1527  | 32 | 127.69 | 15.05   | 0.001           |
| Quadratic polynomial model for the CO <sub>2</sub> emissions and urban are                                                             | 0.532          | 80.84 | 32 | 35.66  | 17.03   | 0.000           |
| Power model for the CO <sub>2</sub> emissions and the proportion of urban land area (proportion of urban land area is less than 10%)   | 0.499          | 72.09 | 28 | 30.48  | 28.13   | 0.000           |
| Power model for the CO <sub>2</sub> emissions and the proportion of urban land area (proportion of urban land area is larger than 10%) | 0.852          | 23.05 | 4  | 11.01  | 17.264  | 0.048           |

Figure S1. Spatial distribution of CO<sub>2</sub> emissions for 2009 (a) and 2019 (b) in the study area

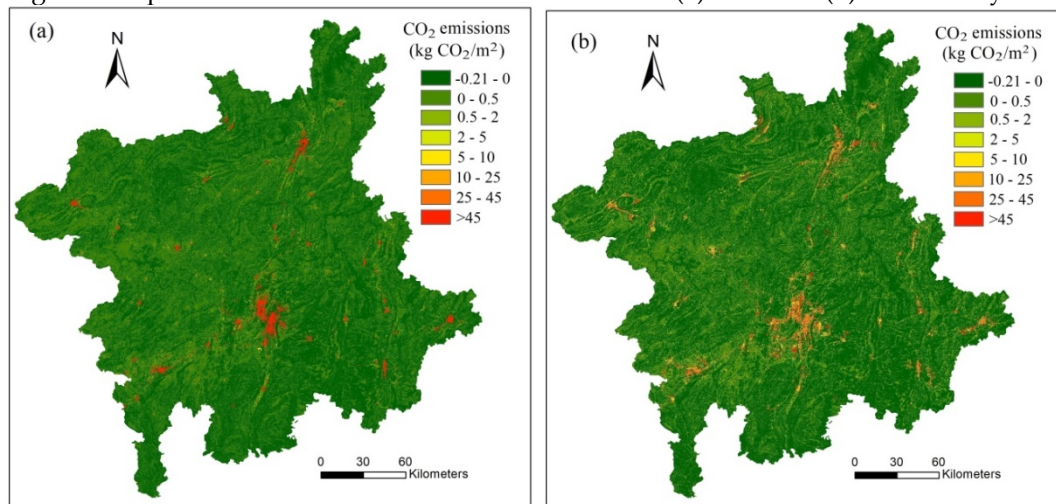

Figure S2. Land use data for 2009 (a) and 2019 (b) in the study area

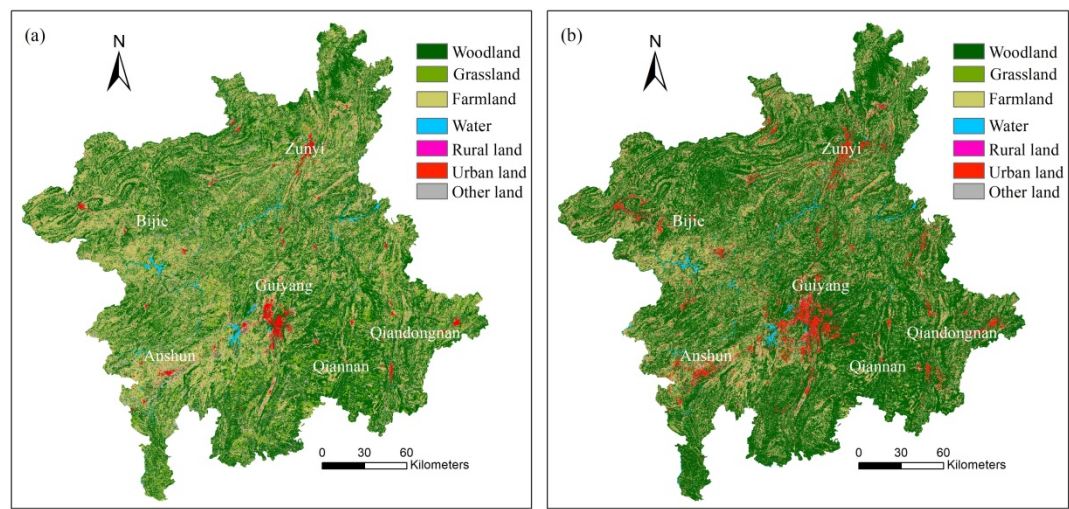

Figure S3 Proportion of other land-use types converted to urban land in 2035.

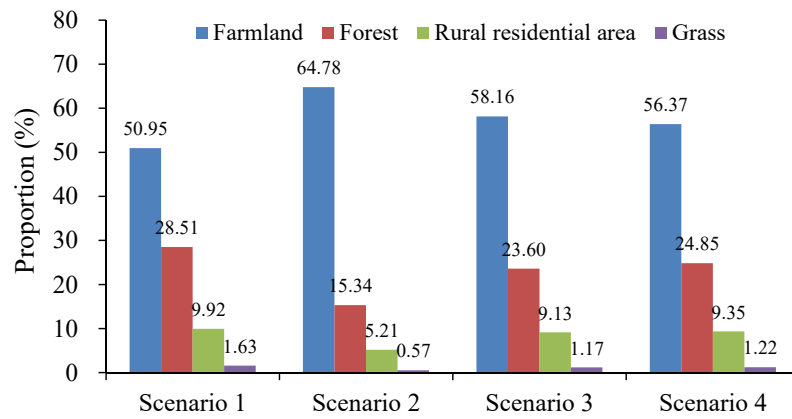

Supplement: s1 [file s1]
